# Supplementary material for: Besifloxacin Nanocrystal: Towards an Innovative Ophthalmic Preparation
Source: MDPI journal article supplement (doi:10.3390/pharmaceutics14102221), 2022-10-18
Supplement: s1 [file s1]

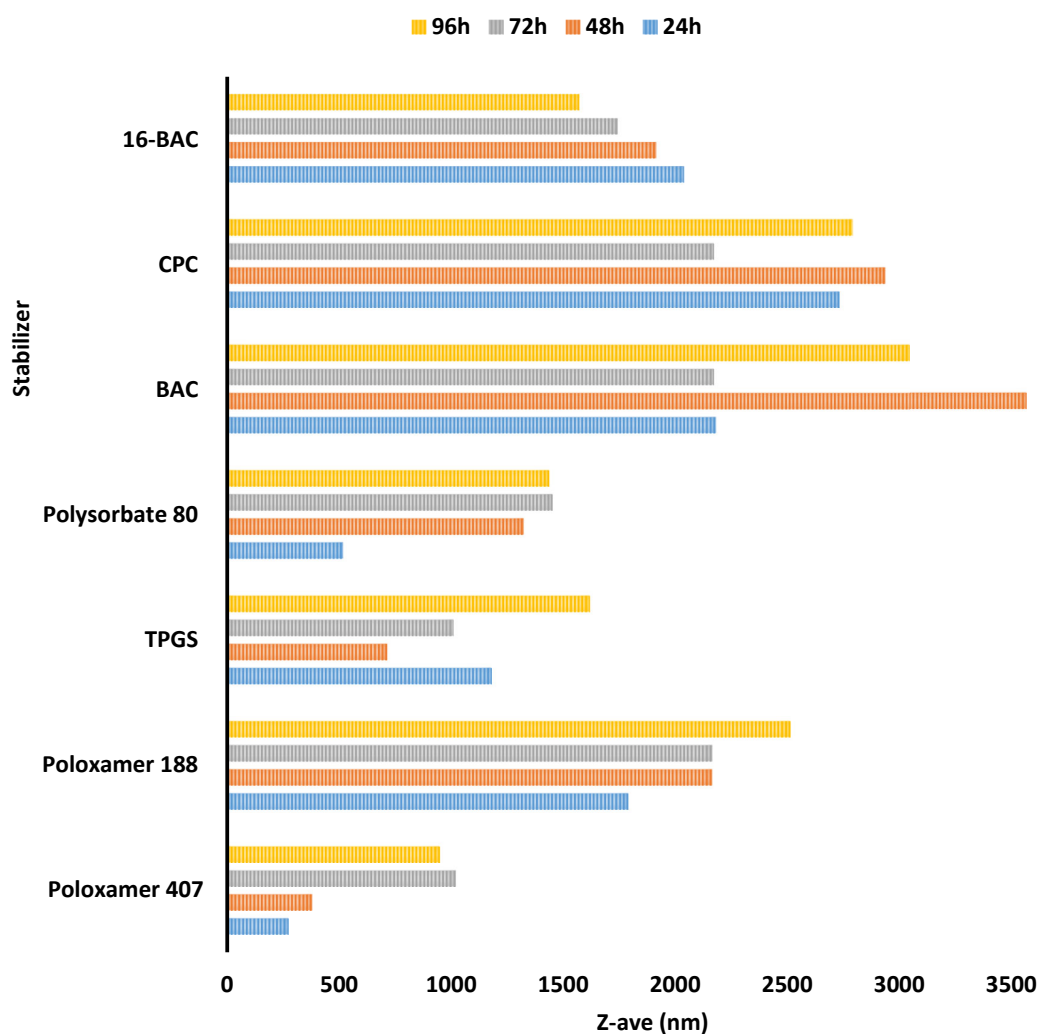

**Figure S1.** Determination of Z-ave (nm) for the first exploratory study. Those stabilizers conventionally used to obtain nanocrystals were tested. The determination of Z-ave was carried out at 24 hours intervals during the milling process (processing time: 96 hours). Conditions: 1200 RPM, 30% (wt%) zirconium beads. Concentration: stabilizer and besifloxacin 0.6 wt% (1:1). BAC: benzalkonium chloride; CPC: cetylpyridinium chloride; TPGS: tocopherol polyethylene glycol succinate; 16-BAC benzyldimethylhexadecylammonium chloride.

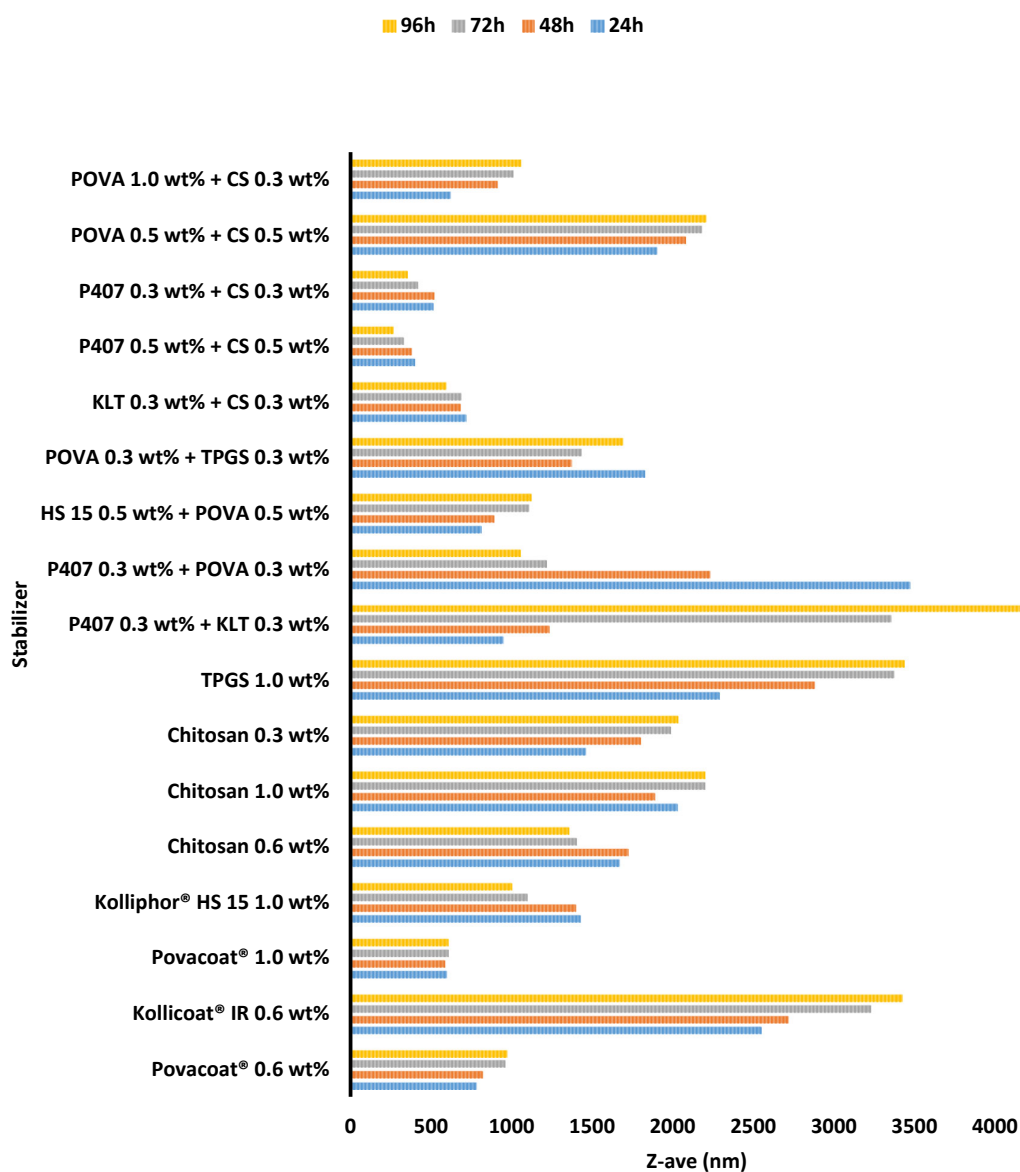

**Figure S2.** Determination of Z-ave (nm) for the second exploratory study. New and promising stabilizers, different combinations. The determination of Z-ave was carried out at 24 hours intervals during the milling process (processing time: 96 hours). Conditions: 1200 RPM and 30% (wt %) zirconium beads. Besifloxacin 0.6 wt %. TPGS: tocopherol polyethylene glycol succinate; P407: Poloxamer 407; KLT: Kollicoat® IR; POVA: Povacoat®; HS 15: Poloxamer HS 15; CS: chitosan.

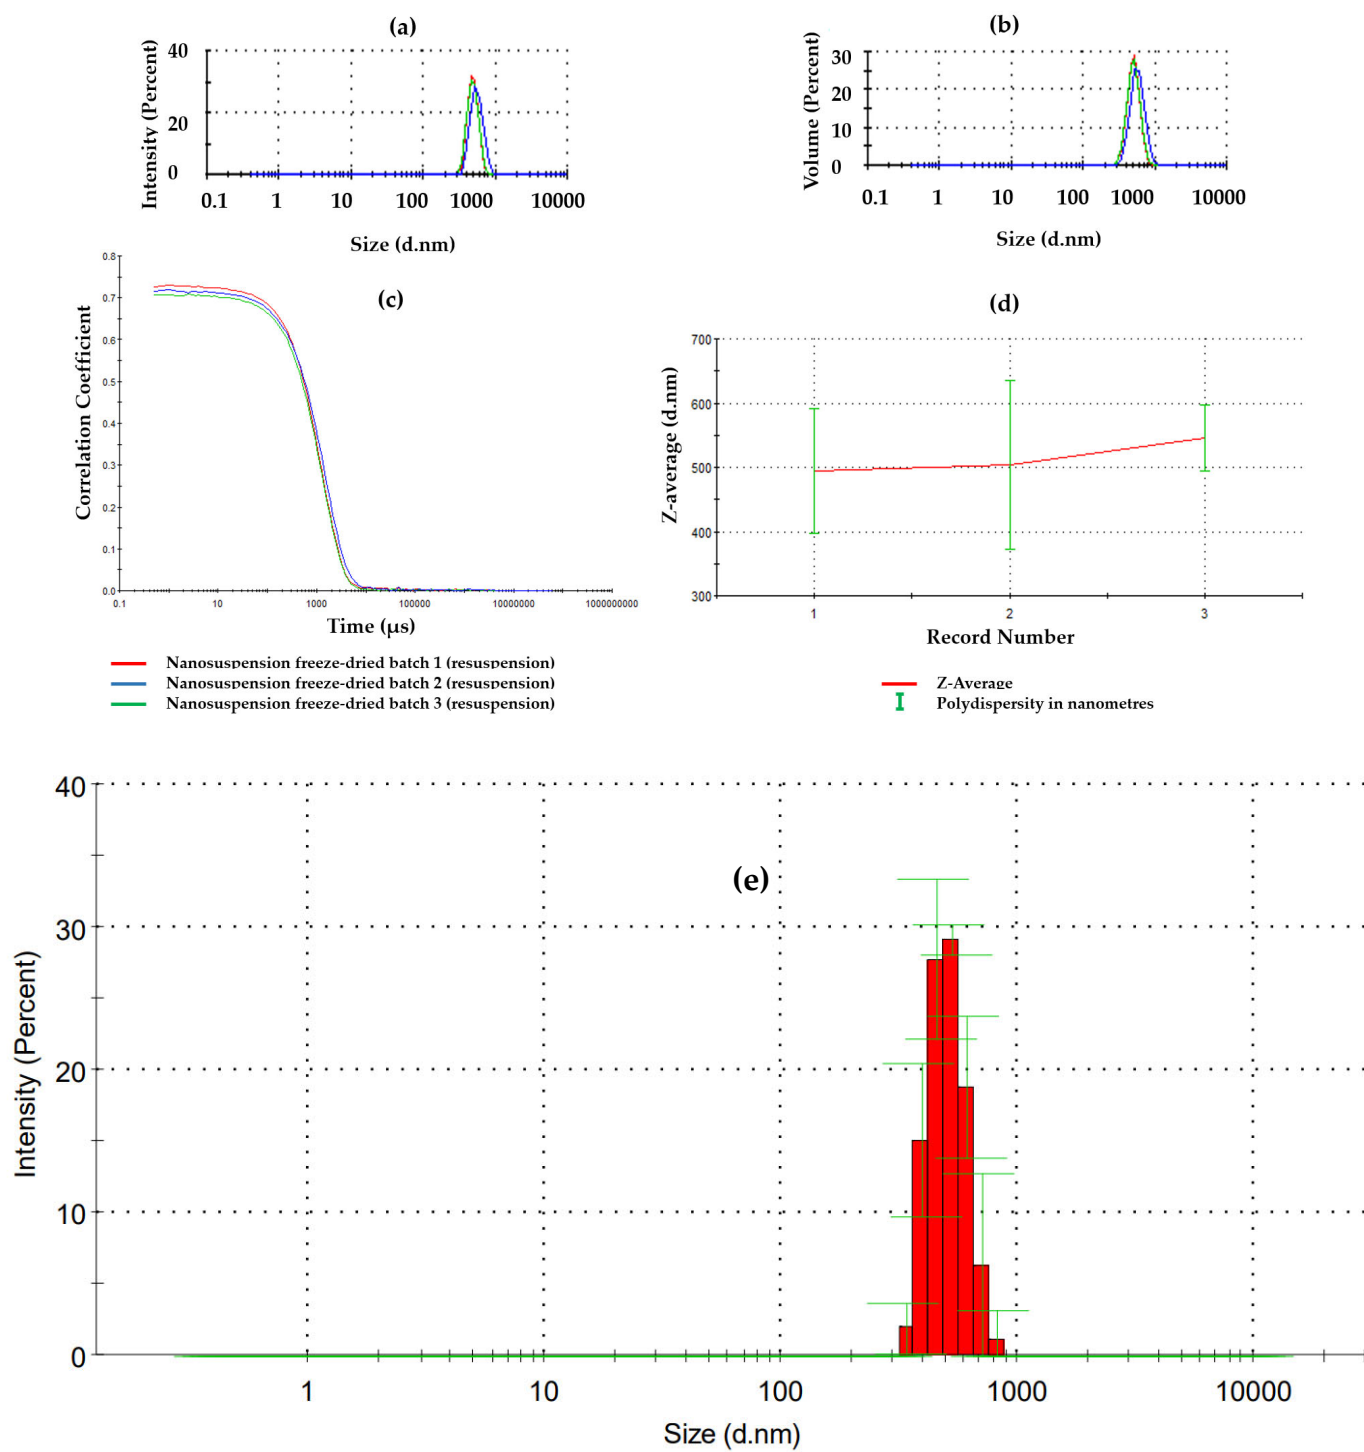

**Figure S3:** Freeze-dried besifloxacin nanosuspension DLS measurements: (a) Size distribution by intensity; (b) Size distribution by volume; (c) Correlogram; (d) Z-average trend; (e) Statistics graph  $n = 3$ .

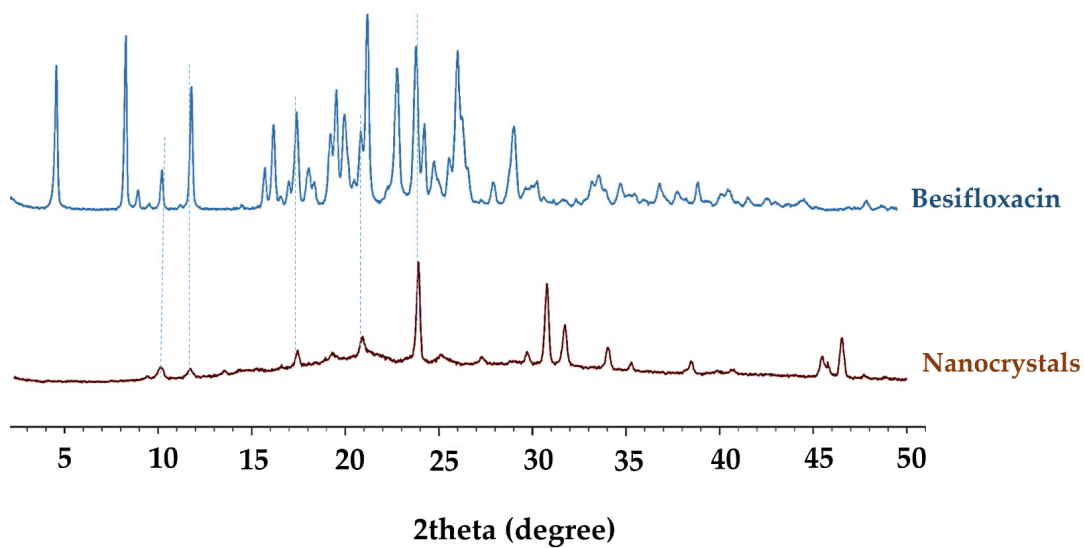

**Figure S4:** X-ray diffraction of besifloxacin (raw material) and nanocrystals (freeze-dried).  $n = 3$ .

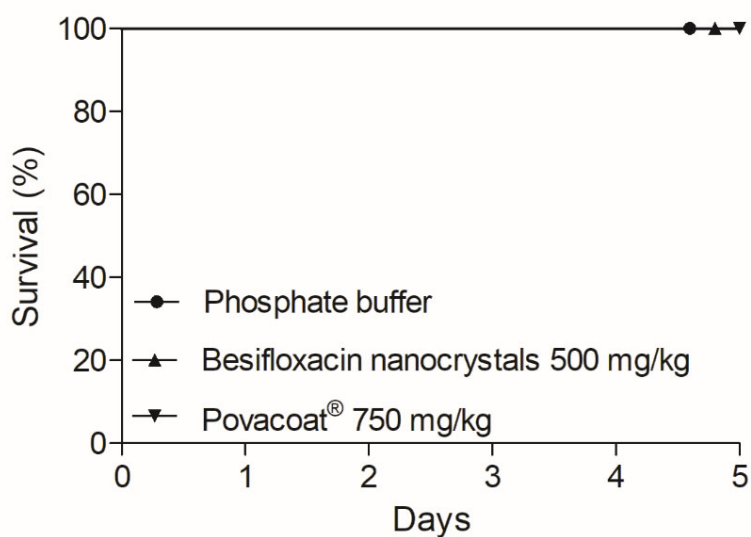

**Figure S5.** Toxicity of besifloxacin nanocrystals (500 mg/kg) and Povacoat® (750 mg/kg) in a larval model of *Galleria mellonella*.

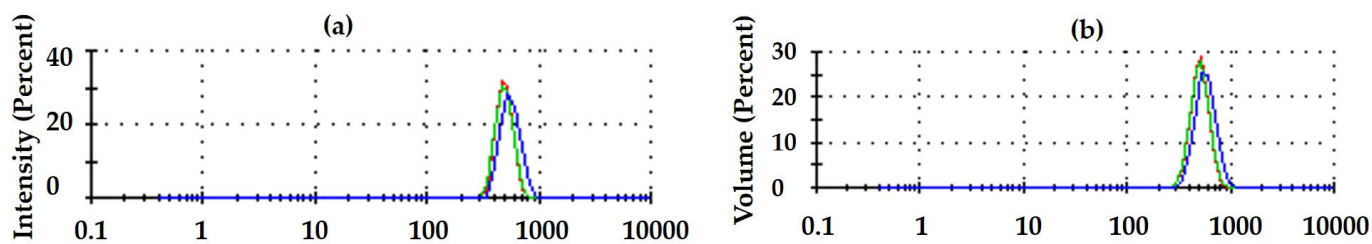

**Figure S6:** Particle distribution (monomodal), accelerated stability: 90 days. Study condition:  $40^{\circ}\text{C} \pm 2^{\circ}\text{C}$  /  $75\% \text{ RH} \pm 5\% \text{ RH}$ . (a) Size distribution by intensity; (b) Size distribution by volume.  $n = 3$ .

**Table S1.** Stability of the average hydrodynamic diameter (Z-ave) in nm, in the time intervals: immediately after milling (T0), 7 days, 15 days and 30 days. Process time 4 days. Storage condition: 25°C.

| Stabilizer                | T0          | Storage time (25°C) |             |            |
|---------------------------|-------------|---------------------|-------------|------------|
|                           |             | 7 days              | 15 days     | 30 days    |
| Povacoat® 1.0 wt%         | 607.2±11.56 | 662.2±10.7          | 660.9±15.5  | 679.4±1.8  |
| Poloxamer P 407 0.6 wt%   | 337.7±14.6  | 418.5±9.9           | 415.5±7.9   | 450.7±10.3 |
| KLT 0.3 wt% + CS 0.3 wt%  | 594.7±22.57 | 1205.0±173.9        | -           | -          |
| Polysorbate 80 0.6 wt%    | 518.9±9.3   | 1100.0±33.5         | -           | -          |
| TPGS                      | 796.5±56.7  | 1570.0±191.3        | -           | -          |
| P407 0.5 wt% + CS 0.5 wt% | 267.6±1.5   | 398.0±5.6           | 428.8±10.8  | -          |
| P407 0.3 wt% + CS 0.3 wt% | 355.3±7.1   | 570.1±18.67         | 479.2±19.35 | -          |

(-): unmeasured; TPGS: tocopherol polyethylene glycol succinate; P407: Poloxamer 407; KLT: Kollicoat® IR; CS: chitosan.

**Table S2:** Nano-based besifloxacin delivery: type, composition, properties, antimicrobial activity and, physical-chemical stability condition.

| Type | Components                                                        | Besifloxacin concentration           | Size                                               | PdI                            | Zeta potential (mV) | Antimicrobial Activity                                                                                                                                                | Physical-chemical stability                                                               | Ref  |
|------|-------------------------------------------------------------------|--------------------------------------|----------------------------------------------------|--------------------------------|---------------------|-----------------------------------------------------------------------------------------------------------------------------------------------------------------------|-------------------------------------------------------------------------------------------|------|
| LP   | LP PC<br>LP PC: SPM                                               | 335.81 - 467.84 µg/mL                | 175.4 - 177.2 nm                                   | 0.019 ± 0.011<br>0.075 ± 0.021 | +19.5 and - 5.7     | <i>S. epidermidis</i> :<br>MIC: 0.156 µg/mL<br><i>P. aeruginosa</i> :<br>MIC: 0.625 µg/mL                                                                             | 6 °C for 30 days                                                                          | [17] |
| NE   | Triacetin (oil),<br>Cremophor® RH 40, and<br>Transcutol®P         | 0.2 wt%                              | 14.0 nm                                            | 0.145 - 0.217                  | -                   | comparative efficacy of lower drug-loaded NE (0.2%) versus 0.6% besifloxacin suspension against <i>P. aeruginosa</i> and <i>S. aureus</i>                             | heating-cooling (2–8 °C) and 40 °C for 48 h + 25 °C, at least 48 h, 13,000 rpm for 30 min | [18] |
| NLC  | Sulfobutyl ether beta-cyclodextrin and chitosan                   | 0.005 % (m/m)                        | 13.6 – 16.1 nm                                     | 0.107 - 0.181                  | +33.8 ± 1.9         | <i>P. aeruginosa</i> :<br>MIC: 0.031 µg/mL                                                                                                                            | 4 °C for 30 days                                                                          | [19] |
| NF   | HP-β-CD;<br>PCL/PEG; sodium alginate or thiolated sodium alginate | 40 µg / cm <sup>2</sup> fiber insert | thickness: 0.66 - 0.83 mm;<br>diameter: 6.6-6.8 mm | -                              | -                   | bacterial keratitis in rabbit eyes was reduced upon single-dose application compared to multiple dosing with the commercial drug.<br><br>Against <i>P. aeruginosa</i> | -                                                                                         | [20] |

LP: Liposome; LP PC: Phosphatidylcholine; LP PC: SPM: Phosphatidylcholine and spermine; HP-β-CD: Hydroxypropyl-beta-cyclodextrin; PCL/PEG: Poly(caprolactone)/polyethyleneglycol MIC: Minimal inhibitory concentration; NE: Nanoemulsion; NF: Nanofibrous; NLC: Nanostructured lipid carrier; PdI: polydispersity index, (-) not disclosed.
